# Supplementary material for: Activity of Liquid and Volatile Fractions of Essential Oils against Biofilm Formed by Selected Reference Strains on Polystyrene and Hydroxyapatite Surfaces
Source: MDPI journal article supplement (doi:10.3390/pathogens10050515), 2021-04-23

## Supplementary materials

# Activity of liquid and volatile fractions of Essential oils against biofilm formed by opportunistic bone pathogens

Ruth Dudek-Wicher <sup>1\*</sup>, Justyna Paleczny <sup>1</sup>, Beata Kowalska-Krochmal <sup>1</sup>, Patrycja Szymczyk <sup>2</sup>, Natalia Pachura <sup>3</sup>, Antoni Szumny <sup>3</sup>, Malwina Brożyna <sup>1</sup>

<sup>1</sup> Department of Pharmaceutical Microbiology and Parasitology, Faculty of Pharmacy, Medical University of Silesian Piasts in Wrocław; [r.dudek.wicher@gmail.com](mailto:r.dudek.wicher@gmail.com); [beakk103@gmail.com](mailto:beakk103@gmail.com); [feliks.junka@gmail.com](mailto:feliks.junka@gmail.com)

<sup>2</sup> Centre for Advanced Manufacturing Technologies, Wrocław University of Technology, Poland, [patrycja.e.szymczyk@pwr.wroc.pl](mailto:patrycja.e.szymczyk@pwr.wroc.pl)

<sup>3</sup> Department of Chemistry, Faculty of Biotechnology and Food Science, Wrocław University of Environmental and Life Sciences. C. K. Norwida street 25. 50-375 Wrocław. Poland; [antoni.szumny@upwr.edu.pl](mailto:antoni.szumny@upwr.edu.pl); [natalia.pachura@upwr.edu.pl](mailto:natalia.pachura@upwr.edu.pl)

\* Correspondence: [r.dudek.wicher@gmail.com](mailto:r.dudek.wicher@gmail.com)

**Figure S1.** Influence of different concentrations of Tween 20 on planktonic forms of tested microorganisms.

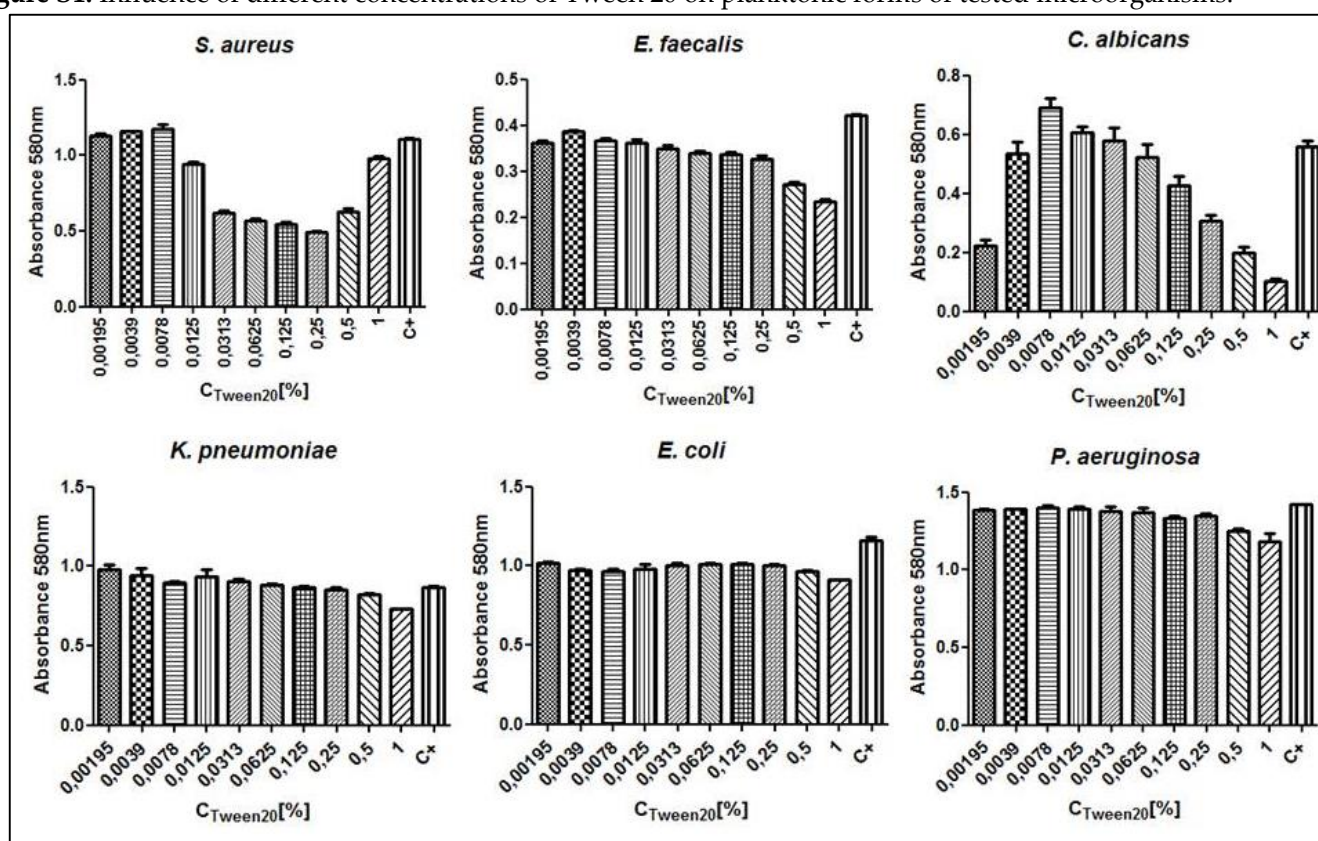

**Figure S2.** Infulence of 0.5% Tween 20 on *C. albicans* and *K.pneumoniae* in comparison to the activity of Tt -Eo.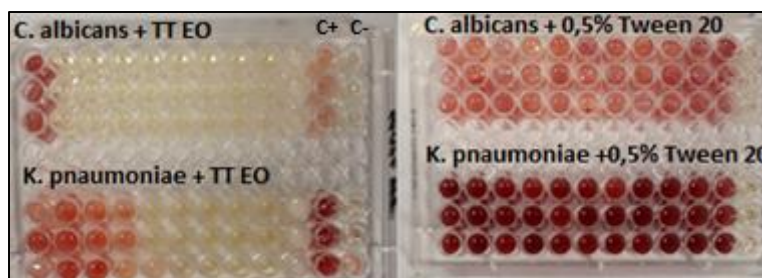**Figure S3.** Eradication of biofilm formed by tested microorganisms by 0.5% Tween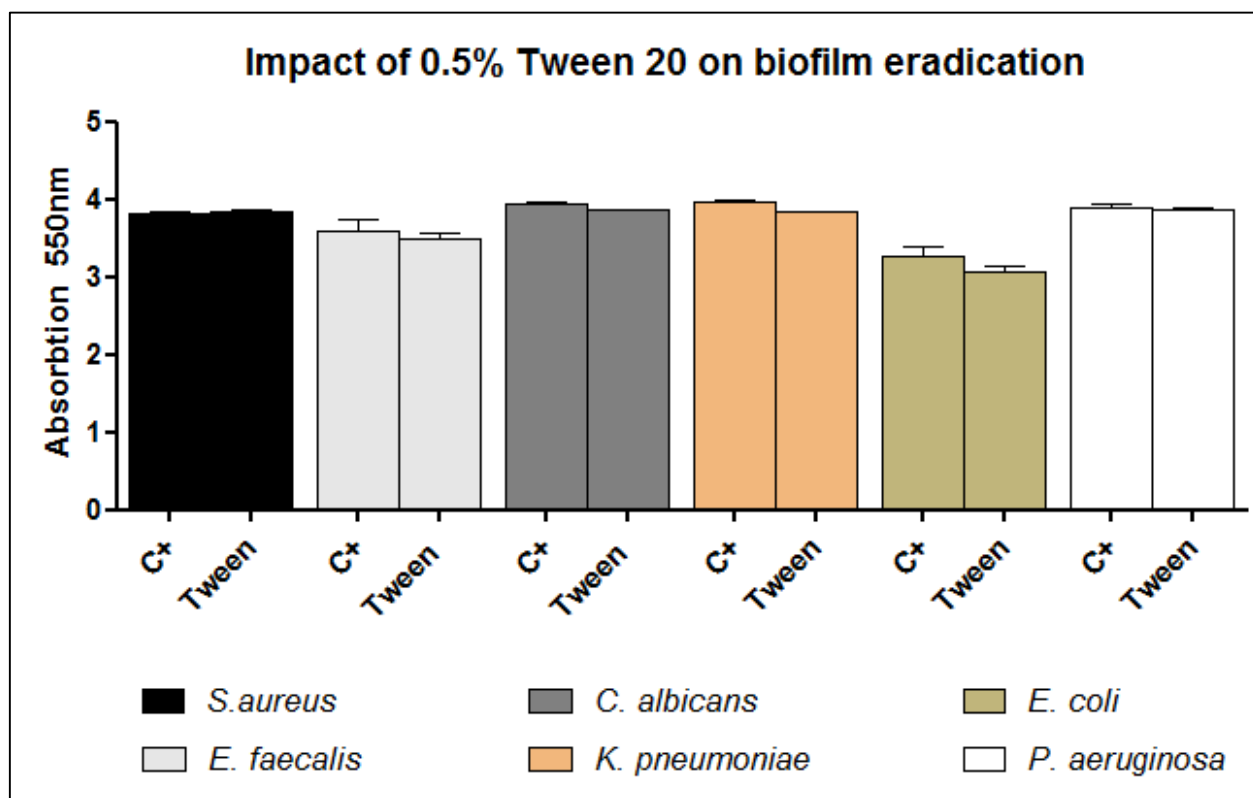**Table S1.** MBEC values (%) of Octenisept against biofilms of tested microorganisms

|     | <i>S. aureus</i> | <i>E. faecalis</i> | <i>C. albicans</i> | <i>E. coli</i> | <i>P. aeruginosa</i> | <i>K. pneumoniae</i> |
|-----|------------------|--------------------|--------------------|----------------|----------------------|----------------------|
| OCT | 3,13             | 3,13               | 0,39               | 6,25           | 12,5                 | 12,5                 |

**Table S2. Volatile fractions concentrations changes in time in AntiBioVol assay.**

| No. | tR<br>[min] | Peak Name                  | Agar plugs samples |              |            |             |            |            |
|-----|-------------|----------------------------|--------------------|--------------|------------|-------------|------------|------------|
|     |             |                            | 2h                 |              | 4h         |             | 24h        |            |
|     |             |                            | Area [%]           | C. [µg]      | Area [%]   | C. [µg]     | Area [%]   | C. [µg]    |
| 1   | 9.05        | α-Thujene                  | 0.52±0.04          | 6.20±0.55    | 0.16±0.02  | 0.62±0.09   | 0.17±0.02  | 0.66±0.09  |
| 2   | 9.33        | α-Pinene                   | 1.40±0.07          | 16.70±0.77   | 0.25±0.07  | 0.95±0.27   | 0.22±0.05  | 0.86±0.28  |
| 3   | 11.31       | Sabinene                   | 0.24±0.02          | 2.86±0.34    | 0.20±0.04  | 0.77±0.13   | 0.21±0.01  | 0.82±0.06  |
| 4   | 11.42       | β-Pinene                   | 0.36±0.05          | 4.25±0.60    | 0.19±0.07  | 0.73±0.27   | 0.15±0.02  | 0.61±0.14  |
| 5   | 12.34       | Myrcene                    | 0.39±0.10          | 4.61±1.17    | 0.24±0.03  | 0.93±0.12   | 0.37±0.04  | 1.45±0.15  |
| 6   | 12.97       | p-Mentha-1(7),8-diene      | 0.58±0.13          | 6.86±1.52    | 0.05±0.03  | 0.18±0.11   | 0.05±0.02  | 0.21±0.09  |
| 7   | 13.69       | α-Terpinene                | 7.15±0.14          | 85.14±3.86   | 2.35±0.12  | 9.06±0.52   | 3.50±0.16  | 13.87±0.47 |
| 8   | 14.13       | p-Cymene                   | 3.66±0.29          | 43.55±3.46   | 1.74±0.17  | 6.73±0.69   | 0.61±0.08  | 2.43±0.33  |
| 9   | 14.37       | β-Phellandrene             | 0.85±0.08          | 10.09±0.70   | 0.28±0.10  | 1.09±0.39   | 0.17±0.05  | 0.69±0.24  |
| 10  | 14.47       | Eucalyptol                 | 1.40±0.06          | 16.63±0.92   | 1.50±0.12  | 5.77±0.47   | 0.79±0.13  | 3.14±0.60  |
| 11  | 16.26       | γ-Terpinene                | 13.51±0.29         | 160.7±3.21   | 4.60±0.26  | 17.75±1.13  | 5.79±0.15  | 23.02±1.29 |
| 12  | 18.05       | Terpinolene                | 2.78±0.11          | 33.02±0.76   | 1.50±0.11  | 5.77±0.44   | 2.60±0.13  | 10.35±0.90 |
| 13  | 18.64       | trans-Sabinene hydrate     | 0.40±0.04          | 4.80±0.50    | 1.33±0.02  | 5.13±0.08   | 1.94±0.04  | 7.71±0.09  |
| 14  | 18.90       | Linalool                   | 0.35±0.08          | 4.17±0.97    | 0.76±0.05  | 2.94±0.16   | 1.01±0.06  | 4.01±0.19  |
| 15  | 20.11       | cis-para-Menth-2-en-1-ol   | 0.35±0.02          | 4.16±0.21    | 4.48±0.07  | 17.28±0.30  | 0.57±0.09  | 2.26±0.51  |
| 16  | 21.30       | trans-para-Menth-2-en-1-ol | 0.21±0.04          | 2.50±0.40    | 0.15±0.04  | 0.57±0.15   | 0.14±0.02  | 0.57±0.11  |
| 17  | 23.89       | Terpinen-4-ol              | 37.29±0.83         | 444.25±24.65 | 30.94±1.70 | 119.28±6.77 | 23.24±0.31 | 92.33±3.75 |
| 18  | 24.33       | p-Cymen-8-ol               | 0.09±0.01          | 1.07±0.14    | 0.08±0.02  | 0.31±0.09   | 2.23±0.10  | 8.88±0.72  |
| 19  | 24.68       | α-Terpineol                | 3.95±0.10          | 47.04±1.09   | 3.10±0.08  | 11.95±0.40  | 0.06±0.02  | 0.25±0.09  |

|    |       |                                |           |            |            |            |            |            |
|----|-------|--------------------------------|-----------|------------|------------|------------|------------|------------|
| 20 | 24.98 | <i>cis</i> -Piperitol          | 0.12±0.04 | 1.43±0.47  | 0.08±0.02  | 0.31±0.06  | 0.14±0.01  | 0.54±0.07  |
| 21 | 25.82 | <i>trans</i> -Piperitol        | 0.21±0.02 | 2.47±0.39  | 0.17±0.01  | 0.66±0.03  | 0.19±0.02  | 0.75±0.08  |
| 22 | 29.80 | <i>trans</i> -Ascaridol glycol | 0.14±0.03 | 1.67±0.36  | 0.17±0.03  | 0.64±0.11  | 0.27±0.04  | 1.06±0.20  |
| 23 | 30.96 | Phellandral                    | 0.58±0.07 | 6.86±0.85  | 2.56±0.13  | 9.86±0.58  | 3.87±0.13  | 15.35±0.58 |
| 24 | 31.53 | Internal standard (100 µg)     | 8.41±0.30 | 100±0.00   | 25.94±0.21 | 100±0.00   | 25.19±0.58 | 100±0.00   |
| 25 | 33.16 | Undec-9-enal                   | 0.65±0.10 | 7.70±1.15  | 1.74±0.17  | 6.70±0.71  | 3.49±0.22  | 13.86±1.22 |
| 26 | 34.30 | δ-Elemene                      | 0.10±0.02 | 1.23±0.30  | 0.11±0.01  | 0.44±0.05  | 4.60±0.32  | 18.30±2.04 |
| 27 | 35.12 | α-Cubebene                     | 0.28±0.08 | 3.37±0.89  | 1.47±0.16  | 5.67±0.64  | 1.69±0.19  | 6.71±0.83  |
| 28 | 36.55 | Isoledene                      | 0.06±0.01 | 0.71±0.08  | 0.04±0.02  | 0.14±0.06  | 0.02±0.00  | 0.09±0.02  |
| 29 | 36.72 | α-Copaene                      | 0.08±0.03 | 0.99±0.39  | 0.11±0.08  | 0.43±0.29  | 0.07±0.01  | 0.28±0.03  |
| 30 | 36.91 | α-Ylangene                     | 0.08±0.03 | 0.91±0.34  | 0.26±0.09  | 1.00±0.34  | 0.22±0.03  | 0.86±0.16  |
| 31 | 38.81 | α-Gurjunene                    | 0.47±0.08 | 5.6±1.00   | 0.09±0.02  | 0.33±0.08  | 0.41±0.02  | 1.64±0.06  |
| 32 | 39.36 | β-Isocomene                    | 0.40±0.10 | 4.77±1.21  | 0.11±0.03  | 0.41±0.11  | 0.08±0.00  | 0.30±0.02  |
| 33 | 39.90 | <i>trans</i> -Caryophyllene    | 0.16±0.02 | 1.87±0.27  | 0.10±0.07  | 0.37±0.26  | 0.16±0.01  | 0.65±0.04  |
| 34 | 40.26 | γ-Elemene                      | 0.05±0.02 | 0.56±0.29  | 0.01±0.00  | 0.05±0.02  | 0.02±0.01  | 0.07±0.05  |
| 35 | 40.56 | Aromadendrene                  | 1.35±0.07 | 16.07±0.98 | 0.09±0.02  | 0.36±0.08  | 0.05±0.02  | 0.20±0.08  |
| 36 | 40.85 | α-Guaiene                      | 0.11±0.03 | 1.31±0.39  | 0.02±0.00  | 0.06±0.02  | 0.01±0.00  | 0.05±0.02  |
| 37 | 41.30 | Guaia-69-diene                 | 0.10±0.04 | 1.19±0.44  | 0.01±0.00  | 0.05±0.02  | 0.02±0.00  | 0.07±0.02  |
| 38 | 41.45 | α-Himachalene                  | 0.07±0.03 | 0.83±0.34  | 0.06±0.02  | 0.23±0.08  | 0.07±0.01  | 0.27±0.05  |
| 39 | 41.88 | Alloaromadendrene              | 0.76±0.12 | 9.1±1.50   | 0.38±0.03  | 1.45±0.11  | 0.41±0.03  | 1.61±0.16  |
| 40 | 42.77 | Cadina-1(6),4-diene            | 0.37±0.05 | 4.43±0.42  | 0.09±0.01  | 0.33±0.04  | 0.11±0.02  | 0.43±0.11  |
| 41 | 43.42 | γ-Gurjunene                    | 0.10±0.03 | 1.20±0.38  | 0.17±0.04  | 0.66±0.14  | 0.17±0.00  | 0.69±0.04  |
| 42 | 43.57 | β-Chamigrene                   | 0.44±0.18 | 5.32±2.21  | 0.81±0.13  | 3.12±0.51  | 0.91±0.04  | 3.61±0.13  |
| 43 | 43.84 | δ-Selinene                     | 0.16±0.05 | 1.95±0.57  | 0.03±0.00  | 0.13±0.02  | 0.03±0.00  | 0.11±0.03  |
| 44 | 44.05 | Viridiflorene                  | 2.51±0.09 | 29.88±1.51 | 0.93±0.08  | 3.57±0.31  | 1.00±0.01  | 3.97±0.16  |
| 45 | 44.42 | α-Murolene                     | 0.80±0.05 | 9.53±0.81  | 2.74±0.34  | 10.57±1.28 | 3.04±0.06  | 12.06±0.48 |
| 46 | 45.79 | δ-Cadinene                     | 1.98±0.40 | 23.6±4.91  | 0.40±0.10  | 1.53±0.41  | 0.39±0.01  | 1.55±0.11  |

|    |       |              |           |           |           |           |           |            |
|----|-------|--------------|-----------|-----------|-----------|-----------|-----------|------------|
| 47 | 46.25 | Zonarene     | 0.57±0.28 | 6.73±3.19 | 1.20±0.16 | 4.61±0.59 | 1.49±0.03 | 5.9±0.20   |
| 48 | 47.74 | Unknown      | 0.55±0.15 | 6.56±1.82 | 1.65±0.21 | 6.34±0.78 | 2.01±0.06 | 7.97±0.29  |
| 49 | 48.15 | Germacrene B | 0.54±0.10 | 6.36±1.06 | 2.43±0.21 | 9.36±0.85 | 3.36±0.12 | 13.33±0.71 |
| 50 | 48.76 | Spathulenol  | 0.70±0.25 | 8.43±3.12 | 0.86±0.09 | 3.30±0.35 | 1.04±0.03 | 4.12±0.17  |
| 51 | 49.13 | Ledol        | 0.49±0.04 | 5.82±0.40 | 0.40±0.17 | 1.53±0.65 | 0.43±0.06 | 1.72±0.26  |
| 52 | 49.55 | Globulol     | 0.54±0.17 | 6.43±2.16 | 0.66±0.10 | 2.53±0.36 | 0.73±0.05 | 2.88±0.22  |
| 53 | 49.72 | Unknown      | 0.12±0.02 | 1.38±0.27 | 0.11±0.02 | 0.44±0.06 | 0.33±0.15 | 1.31±0.76  |
| 54 | 50.19 | Viridiflorol | 0.18±0.01 | 2.14±0.13 | 0.11±0.01 | 0.44±0.05 | 0.12±0.01 | 0.46±0.05  |
| 55 | 51.35 | γ-Eudesmol   | 0.14±0.05 | 1.61±0.60 | 0.04±0.01 | 0.15±0.03 | 0.04±0.01 | 0.17±0.04  |
| 56 | 51.69 | Epicubenol   | 0.18±0.09 | 2.11±1.08 | 0.03±0.02 | 0.10±0.07 | 0.02±0.00 | 0.07±0.02  |

|     |          |                        | HA disc samples |              |           |            |           |            |
|-----|----------|------------------------|-----------------|--------------|-----------|------------|-----------|------------|
|     |          |                        | 2h              |              | 4h        |            | 24h       |            |
| No. | tR [min] | Peak Name              | Area [%]        | C. [µg/g]    | Area [%]  | C. [µg/g]  | Area [%]  | C. [µg/g]  |
| 1   | 9.05     | α-Thujene              | 1.16±0.08       | 34.11±4.17   | 0.26±0.04 | 0.72±0.11  | 0.22±0.02 | 0.56±0.07  |
| 2   | 9.33     | α-Pinene               | 2.37±0.18       | 69.54±5.04   | 0.27±0.04 | 0.76±0.19  | 0.29±0.02 | 0.72±0.05  |
| 3   | 11.31    | Sabinene               | 0.32±0.06       | 9.36±1.66    | 0.23±0.03 | 0.66±0.13  | 0.26±0.03 | 0.66±0.07  |
| 4   | 11.42    | β-Pinene               | 0.65±0.09       | 18.92±2.22   | 0.21±0.04 | 0.59±0.15  | 0.14±0.01 | 0.35±0.02  |
| 5   | 12.34    | Myrcene                | 0.75±0.06       | 22.12±1.32   | 0.49±0.05 | 1.38±0.17  | 0.81±0.02 | 2.06±0.11  |
| 6   | 12.97    | p-Mentha-1(7),8-diene  | 0.61±0.08       | 17.83±2.72   | 0.26±0.04 | 0.75±0.15  | 0.08±0.01 | 0.20±0.04  |
| 7   | 13.69    | α-Terpinene            | 8.38±0.21       | 246.44±6.16  | 3.63±0.14 | 10.26±0.86 | 3.85±0.09 | 9.74±0.53  |
| 8   | 14.13    | p-Cymene               | 4.06±0.05       | 119.36±4.60  | 1.46±0.28 | 4.14±1.16  | 0.20±0.02 | 0.51±0.05  |
| 9   | 14.37    | β-Phellandrene         | 1.41±0.20       | 41.87±9.26   | 0.38±0.08 | 1.07±0.31  | 0.37±0.07 | 0.94±0.19  |
| 10  | 14.47    | Eucalyptol             | 1.32±0.06       | 38.69±0.15   | 0.27±0.07 | 0.77±0.22  | 0.22±0.05 | 0.57±0.16  |
| 11  | 16.26    | γ-Terpinene            | 13.59±0.98      | 398.96±17.66 | 6.50±0.14 | 18.37±1.07 | 6.39±0.12 | 16.15±0.06 |
| 12  | 18.05    | Terpinolene            | 3.69±0.19       | 108.74±8.96  | 2.51±0.16 | 7.11±0.87  | 2.25±0.18 | 5.69±0.71  |
| 13  | 18.64    | trans-Sabinene hydrate | 0.22±0.02       | 6.58±0.73    | 2.22±0.08 | 6.29±0.52  | 1.99±0.04 | 5.03±0.17  |

|    |       |                                    |            |               |            |            |            |            |
|----|-------|------------------------------------|------------|---------------|------------|------------|------------|------------|
| 14 | 18.90 | Linalool                           | 0.17±0.02  | 5.10±0.69     | 1.42±0.16  | 4.03±0.73  | 1.28±0.21  | 3.23±0.56  |
| 15 | 20.11 | <i>cis</i> -para-Menth-2-en-1-ol   | 0.40±0.01  | 11.78±0.89    | 0.37±0.09  | 1.05±0.29  | 0.35±0.11  | 0.90±0.35  |
| 16 | 21.30 | <i>trans</i> -para-Menth-2-en-1-ol | 0.28±0.02  | 8.26±0.93     | 0.09±0.00  | 0.25±0.02  | 0.05±0.00  | 0.13±0.01  |
| 17 | 23.89 | Terpinen-4-ol                      | 35.64±0.61 | 1050.09±76.69 | 9.00±0.49  | 25.40±1.27 | 4.55±0.20  | 11.52±0.78 |
| 18 | 24.33 | p-Cymen-8-ol                       | 4.54±0.27  | 134.06±16.07  | 0.59±0.06  | 1.66±0.17  | 0.30±0.05  | 0.75±0.13  |
| 19 | 24.68 | α-Terpineol                        | 0.09±0.00  | 2.56±0.30     | 0.05±0.02  | 0.15±0.08  | 0.03±0.01  | 0.08±0.02  |
| 20 | 24.98 | <i>cis</i> -Piperitol              | 0.06±0.02  | 1.79±0.87     | 0.20±0.02  | 0.57±0.09  | 0.09±0.01  | 0.24±0.03  |
| 21 | 25.82 | <i>trans</i> -Piperitol            | 0.16±0.03  | 4.71±1.10     | 0.07±0.02  | 0.20±0.05  | 0.12±0.03  | 0.31±0.08  |
| 22 | 29.80 | <i>trans</i> -Ascaridol glycol     | 0.07±0.01  | 2.15±0.35     | 0.30±0.06  | 0.86±0.20  | 0.39±0.04  | 0.98±0.13  |
| 23 | 30.96 | Phellandral                        | 0.35±0.04  | 10.17±1.09    | 4.50±0.13  | 12.74±1.06 | 4.70±0.16  | 11.88±0.39 |
| 24 | 31.53 | Internal standard (100 ug)         | 3.40±0.15  | 100±0.00      | 35.44±1.29 | 100±0.00   | 39.57±0.83 | 100±0.00   |
| 25 | 33.16 | Undec-9-enal                       | 0.36±0.03  | 10.73±1.75    | 2.64±0.29  | 7.44±0.76  | 3.30±0.20  | 8.36±0.78  |
| 26 | 34.30 | δ-Elemene                          | 0.37±0.00  | 10.80±0.74    | 4.66±0.28  | 13.20±1.48 | 4.26±0.17  | 10.77±0.38 |
| 27 | 35.12 | α-Cubebene                         | 0.27±0.02  | 7.83±0.32     | 1.83±0.17  | 5.16±0.56  | 2.08±0.03  | 5.25±0.16  |
| 28 | 36.55 | Isoledene                          | 0.08±0.00  | 2.26±0.28     | 0.04±0.00  | 0.12±0.01  | 0.04±0.02  | 0.11±0.05  |
| 29 | 36.72 | α-Copaene                          | 0.15±0.02  | 4.53±0.89     | 0.07±0.01  | 0.20±0.05  | 0.15±0.04  | 0.38±0.11  |
| 30 | 36.91 | α-Ylangene                         | 0.07±0.00  | 1.97±0.27     | 0.27±0.02  | 0.76±0.10  | 0.30±0.05  | 0.77±0.17  |
| 31 | 38.81 | α-Gurjunene                        | 0.66±0.02  | 19.44±1.49    | 0.48±0.07  | 1.36±0.23  | 0.62±0.05  | 1.58±0.19  |
| 32 | 39.36 | β-Isocomene                        | 0.65±0.04  | 19.28±2.30    | 0.09±0.01  | 0.25±0.04  | 0.11±0.02  | 0.27±0.08  |
| 33 | 39.90 | <i>trans</i> -Caryophyllene        | 0.13±0.01  | 3.72±0.15     | 0.25±0.02  | 0.70±0.04  | 0.23±0.05  | 0.58±0.18  |
| 34 | 40.26 | γ-Elemene                          | 0.1±0.00   | 3.04±0.26     | 0.02±0.01  | 0.06±0.03  | 0.02±0.01  | 0.05±0.04  |
| 35 | 40.56 | Aromadendrene                      | 1.51±0.16  | 44.71±7.85    | 0.04±0.01  | 0.10±0.04  | 0.03±0.01  | 0.08±0.04  |
| 36 | 40.85 | α-Guaiene                          | 0.18±0.00  | 5.30±0.28     | 0.02±0.01  | 0.06±0.03  | 0.02±0.01  | 0.05±0.03  |
| 37 | 41.30 | Guaia-6.9-diene                    | 0.17±0.00  | 5.11±0.42     | 0.10±0.03  | 0.27±0.11  | 0.03±0.01  | 0.08±0.04  |
| 38 | 41.45 | α-Himachalene                      | 0.14±0.00  | 4.22±0.37     | 0.40±0.05  | 1.13±0.11  | 0.06±0.01  | 0.16±0.04  |
| 39 | 41.88 | Alloaromadendrene                  | 0.92±0.04  | 27.23±2.71    | 0.18±0.04  | 0.50±0.15  | 0.56±0.03  | 1.43±0.13  |
| 40 | 42.77 | Cadina-1(6),4-diene                | 0.47±0.02  | 13.76±1.36    | 0.18±0.02  | 0.50±0.05  | 0.76±0.07  | 1.92±0.26  |

|    |       |                     |                 |                  |                 |                 |                 |                  |
|----|-------|---------------------|-----------------|------------------|-----------------|-----------------|-----------------|------------------|
| 41 | 43.42 | $\gamma$ -Gurjunene | 0.10 $\pm$ 0.01 | 2.95 $\pm$ 0.45  | 0.78 $\pm$ 0.12 | 2.20 $\pm$ 0.40 | 0.21 $\pm$ 0.03 | 0.54 $\pm$ 0.11  |
| 42 | 43.57 | $\beta$ -Chamigrene | 0.17 $\pm$ 0.01 | 4.89 $\pm$ 0.24  | 0.34 $\pm$ 0.36 | 1.01 $\pm$ 1.32 | 1.25 $\pm$ 0.07 | 3.15 $\pm$ 0.22  |
| 43 | 43.84 | $\delta$ -Selinene  | 0.23 $\pm$ 0.00 | 6.87 $\pm$ 0.51  | 1.05 $\pm$ 0.04 | 2.96 $\pm$ 0.29 | 0.07 $\pm$ 0.02 | 0.18 $\pm$ 0.05  |
| 44 | 44.05 | Viridiflorene       | 2.86 $\pm$ 0.08 | 84.40 $\pm$ 7.31 | 3.44 $\pm$ 0.07 | 9.73 $\pm$ 0.65 | 1.38 $\pm$ 0.21 | 3.48 $\pm$ 0.66  |
| 45 | 44.42 | $\alpha$ -Muurolene | 0.60 $\pm$ 0.03 | 17.65 $\pm$ 1.04 | 1.87 $\pm$ 0.05 | 5.29 $\pm$ 0.31 | 4.17 $\pm$ 0.10 | 10.53 $\pm$ 0.12 |
| 46 | 45.79 | $\delta$ -Cadinene  | 2.75 $\pm$ 0.09 | 81.08 $\pm$ 7.50 | 0.34 $\pm$ 0.03 | 0.96 $\pm$ 0.13 | 0.36 $\pm$ 0.06 | 0.90 $\pm$ 0.17  |
| 47 | 46.25 | Zonarene            | 0.12 $\pm$ 0.00 | 3.53 $\pm$ 0.19  | 1.61 $\pm$ 0.16 | 4.57 $\pm$ 0.78 | 1.65 $\pm$ 0.23 | 4.17 $\pm$ 0.75  |
| 48 | 47.74 | Unknown             | 0.54 $\pm$ 0.02 | 15.92 $\pm$ 1.42 | 2.06 $\pm$ 0.03 | 5.83 $\pm$ 0.21 | 2.63 $\pm$ 0.28 | 6.65 $\pm$ 0.98  |
| 49 | 48.15 | Germacrene B        | 0.43 $\pm$ 0.04 | 12.78 $\pm$ 2.01 | 3.52 $\pm$ 0.17 | 9.96 $\pm$ 1.07 | 4.13 $\pm$ 0.22 | 10.45 $\pm$ 0.95 |
| 50 | 48.76 | Spathulenol         | 0.35 $\pm$ 0.03 | 10.44 $\pm$ 1.73 | 1.13 $\pm$ 0.05 | 3.20 $\pm$ 0.32 | 1.17 $\pm$ 0.14 | 2.96 $\pm$ 0.51  |
| 51 | 49.13 | Ledol               | 0.58 $\pm$ 0.05 | 17.14 $\pm$ 2.64 | 0.61 $\pm$ 0.09 | 1.74 $\pm$ 0.36 | 0.70 $\pm$ 0.12 | 1.77 $\pm$ 0.40  |
| 52 | 49.55 | Globulol            | 0.31 $\pm$ 0.01 | 9.14 $\pm$ 0.97  | 0.72 $\pm$ 0.06 | 2.04 $\pm$ 0.13 | 0.81 $\pm$ 0.05 | 2.05 $\pm$ 0.20  |
| 53 | 49.72 | Unknown             | 0.17 $\pm$ 0.01 | 5.11 $\pm$ 0.60  | 0.29 $\pm$ 0.17 | 0.84 $\pm$ 0.65 | 0.17 $\pm$ 0.05 | 0.43 $\pm$ 0.15  |
| 54 | 50.19 | Viridiflorol        | 0.23 $\pm$ 0.02 | 6.80 $\pm$ 1.12  | 0.17 $\pm$ 0.05 | 0.48 $\pm$ 0.18 | 0.13 $\pm$ 0.01 | 0.32 $\pm$ 0.04  |
| 55 | 51.35 | $\gamma$ -Eudesmol  | 0.24 $\pm$ 0.02 | 6.99 $\pm$ 1.10  | 0.04 $\pm$ 0.03 | 0.13 $\pm$ 0.11 | 0.06 $\pm$ 0.01 | 0.14 $\pm$ 0.03  |
| 56 | 51.69 | Epicubenol          | 0.38 $\pm$ 0.02 | 11.31 $\pm$ 1.32 | 0.02 $\pm$ 0.00 | 0.07 $\pm$ 0.02 | 0.03 $\pm$ 0.01 | 0.07 $\pm$ 0.03  |

C. - Concentration in  $\mu\text{g/g}$ ,

**Figure S4.** Chromatogram comparison of fresh TT-EO, after 2 and 24 h in agar plugs samples

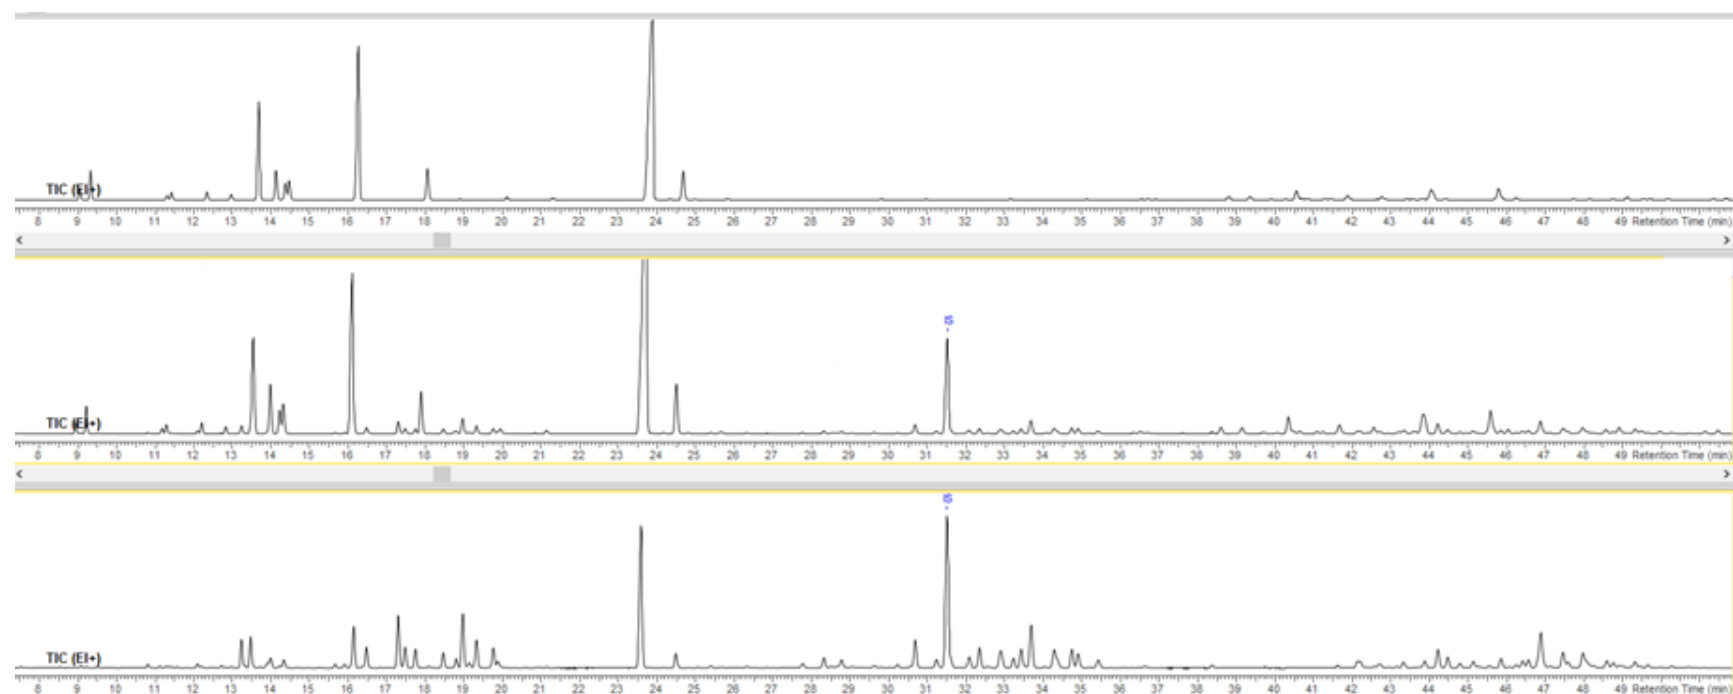



**Figure S5.** Chromatogram comparison of fresh Tt-EO, after 2 and 24 h in HA disc samples.

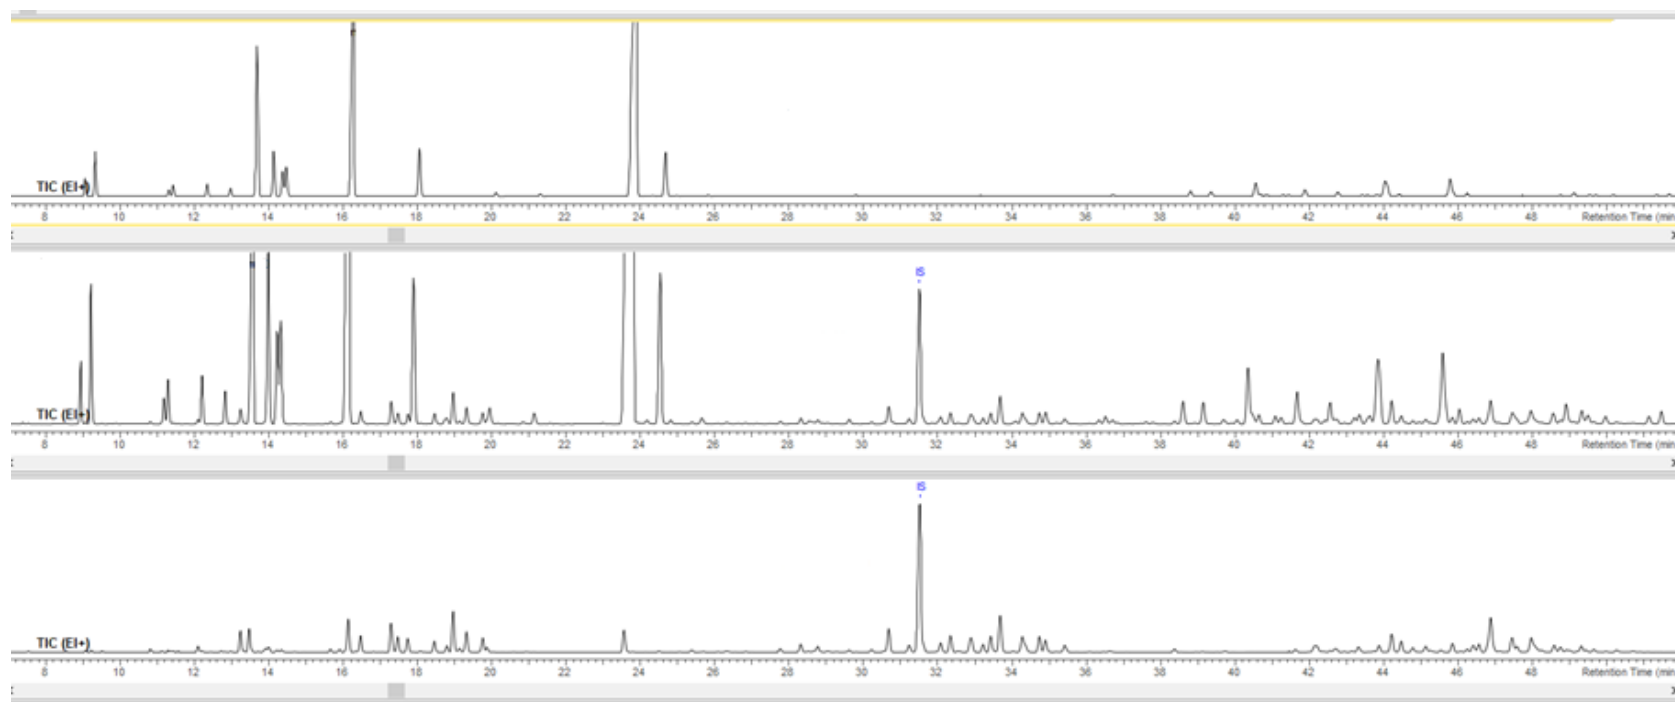

**Table S3. Ingredients of tested EOs measured with GC-MS.****A.Clove EO**

| No. | tR [min] | Peak Name                           | KI exp. | KI lit. FFJ | Area [%] |
|-----|----------|-------------------------------------|---------|-------------|----------|
| 1   | 25.05    | Dodec-1-ene                         | 1193    | 1194        | 0.06     |
| 2   | 29.15    | Chavicol                            | 1257    | 1254        | 0.09     |
| 3   | 35.22    | $\alpha$ -Cubebene                  | 1355    | 1349        | 0.01     |
| 4   | 36.03    | Eugenol                             | 1362    | 1357        | 75.73    |
| 5   | 36.85    | $\alpha$ -Copaene                   | 1374    | 1375        | 0.11     |
| 6   | 38.15    | Tetradec-1-ene                      | 1393    | 1392        | 0.12     |
| 7   | 39.50    | <i>trans</i> -Caryophyllene         | 1415    | 1424        | 10.88    |
| 8   | 41.55    | $\alpha$ -Humulene                  | 1450    | 1454        | 2.88     |
| 9   | 45.46    | Impurity                            | 1513    | -           | 0.21     |
| 10  | 45.88    | $\delta$ -Cadinene                  | 1521    | 1519        | 0.45     |
| 11  | 46.29    | Eugenyl acetate                     | 1528    | 1521        | 7.90     |
| 12  | 47.41    | Italicene epoxide                   | 1548    | 1546        | 0.21     |
| 13  | 48.37    | <i>trans</i> -Nerolidol             | 1564    | 1561        | 0.09     |
| 14  | 49.13    | Unknown                             | 1577    | n.d.        | 1.06     |
| 15  | 50.11    | Tetradec-(7Z)-enal                  | 1593    | 1593        | 0.25     |
| 16  | 47.08    | <i>trans</i> - $\alpha$ -Bisabolene | 1542    | 1540        | 2.63     |

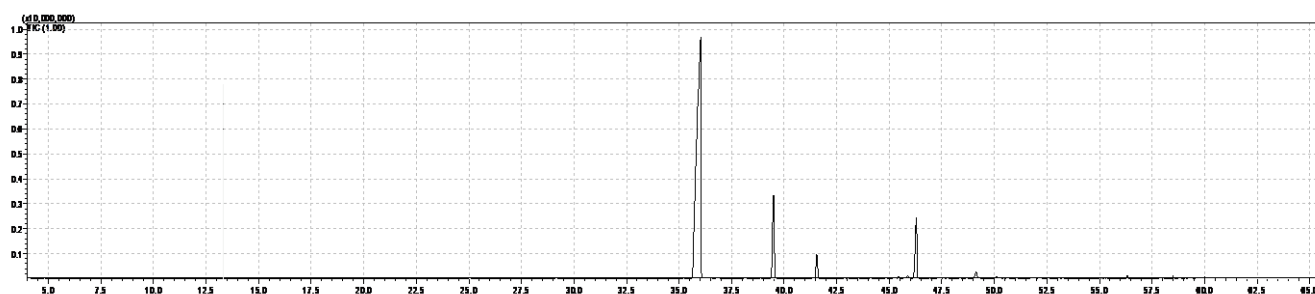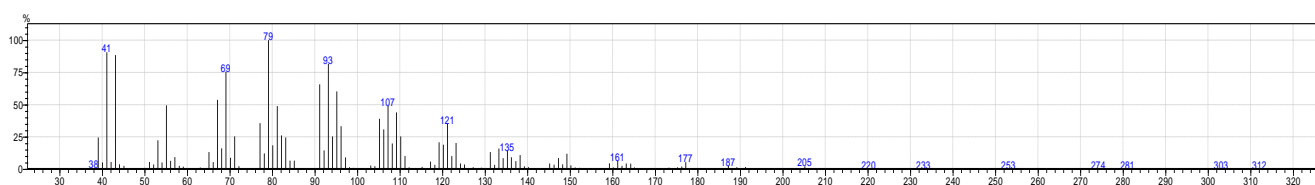

**B. Geranium EO**

| No. | tR [min] | Peak Name                                     | KI exp. | KI lit. FFJ | Area [%] |
|-----|----------|-----------------------------------------------|---------|-------------|----------|
| 1   | 9.385    | $\alpha$ -Pinene                              | 932     | 933         | 0.32     |
| 2   | 11.29    | 2H-Pyran,2-ethenyltetrahydro-2,6,6-trimethyl- | 969     | 968         | 0.09     |
| 3   | 12.41    | Myrcene                                       | 992     | 991         | 0.15     |
| 4   | 13.04    | $\alpha$ -Phellandrene                        | 1004    | 1002        | 0.08     |
| 5   | 14.2     | p-Cymene                                      | 1025    | 1025        | 0.09     |
| 6   | 14.44    | Limonene                                      | 1030    | 1030        | 0.27     |
| 7   | 15.14    | <i>cis</i> - $\beta$ -Ocimene                 | 1041    | 1035        | 0.10     |
| 8   | 15.75    | <i>trans</i> - $\beta$ -Ocimene               | 1047    | 1047        | 0.08     |
| 9   | 17.15    | <i>cis</i> -Linalool oxide                    | 1069    | 1069        | 0.21     |
| 10  | 18.14    | <i>trans</i> -Linalool oxide                  | 1086    | 1086        | 0.16     |
| 11  | 18.97    | Linalool                                      | 1099    | 1101        | 3.64     |
| 12  | 19.61    | <i>cis</i> -Rose oxide                        | 1109    | 1012        | 2.04     |
| 13  | 20.65    | <i>trans</i> -Rose oxide                      | 1127    | 1125        | 0.79     |
| 14  | 21.73    | <i>cis</i> -Verbenol                          | 1141    | 1141        | 0.10     |
| 15  | 22.26    | Isopulegol                                    | 1150    | 1149        | 3.29     |
| 16  | 22.93    | Menthone                                      | 1159    | 1158        | 5.10     |
| 17  | 24.23    | Menthol                                       | 1182    | 1179        | 0.19     |
| 18  | 24.74    | $\alpha$ -Terpineol                           | 1189    | 1195        | 0.43     |
| 19  | 26.78    | Unknown                                       | 1219    | n.d.        | 0.11     |
| 20  | 27.61    | Citronellol                                   | 1231    | 1233        | 34.20    |
| 21  | 28.20    | Neral                                         | 1239    | 1238        | 0.19     |
| 22  | 29.22    | Geraniol                                      | 1256    | 1255        | 7.60     |
| 23  | 30.18    | Geranial                                      | 1269    | 1269        | 0.27     |
| 24  | 30.62    | Citronellyl formate                           | 1277    | 1276        | 11.40    |
| 25  | 32.34    | Geranyl formate                               | 1300    | 1300        | 2.08     |
| 26  | 35.21    | $\alpha$ -Cubebene                            | 1352    | 1349        | 0.13     |
| 27  | 35.67    | Citronellyl acetate                           | 1354    | 1350        | 0.57     |
| 28  | 36.81    | $\alpha$ -Copaene                             | 1373    | 1375        | 0.41     |
| 29  | 37.33    | $\beta$ -Bourbonene                           | 1381    | 1383        | 1.11     |
| 30  | 37.60    | <i>trans</i> -Geranyl acetate                 | 1385    | 1380        | 0.23     |
| 31  | 38.13    | Tetradec-1-ene                                | 1392    | 1392        | 0.18     |
| 32  | 39.45    | <i>trans</i> -Caryophyllene                   | 1415    | 1424        | 1.33     |
| 33  | 40.76    | $\alpha$ -Guaiene                             | 1437    | 1438        | 0.49     |
| 34  | 41.03    | Guaia-6,9-diene                               | 1440    | 1444        | 5.86     |
| 35  | 41.29    | Citronellyl propionate                        | 1440    | 1443        | 1.69     |
| 36  | 41.54    | $\alpha$ -Humulene                            | 1453    | 1445        | 0.42     |

|    |       |                                    |      |      |      |
|----|-------|------------------------------------|------|------|------|
| 37 | 41.98 | 9- <i>epi-trans</i> -Caryophyllene | 1458 | 1464 | 0.39 |
| 38 | 42.85 | Cadina-1(6),4-diene                | 1469 | 1472 | 0.37 |
| 39 | 43.22 | Germacrene D                       | 1476 | 1480 | 1.67 |
| 40 | 44.13 | Viridiflorene                      | 1491 | 1491 | 1.21 |
| 41 | 44.51 | $\alpha$ -Muurolene                | 1497 | 1497 | 0.19 |
| 42 | 45.26 | $\delta$ -Amorphene                | 1509 | 1506 | 0.25 |
| 43 | 45.88 | $\delta$ -Cadinene                 | 1520 | 1518 | 1.36 |
| 44 | 46.38 | Citronellyl butyrate               | 1528 | 1529 | 1.93 |
| 45 | 46.92 | Europelargone A                    | 1538 | 1539 | 0.33 |
| 46 | 48.26 | Geranyl butyrate                   | 1559 | 1559 | 1.13 |
| 47 | 48.88 | Dihydroisocaryophyllene epoxide    | 1571 | 1656 | 0.23 |
| 48 | 49.52 | Phenylethyl-Tiglate                | 1583 | 1584 | 1.24 |
| 49 | 50.11 | Tetradec-(7Z)-enal                 | 1593 | 1593 | 0.24 |
| 50 | 50.67 | Geranyl isovalerate                | 1607 | 1604 | 0.23 |
| 51 | 51.85 | Epicubenol                         | 1633 | 1632 | 0.32 |
| 52 | 52.58 | T-Muurolol                         | 1650 | 1645 | 0.18 |
| 53 | 53.72 | Tetradec-(11Z)-enyl alcohol        | 1675 | 1676 | 1.14 |
| 54 | 54.28 | 2,3-dihydro-Farnesol               | 1686 | 1688 | 0.29 |
| 55 | 54.68 | Geranyl tiglate                    | 1701 | 1698 | 1.54 |
| 56 | 55.05 | 2Z,6E-Farnesol                     | 1722 | 1723 | 0.32 |

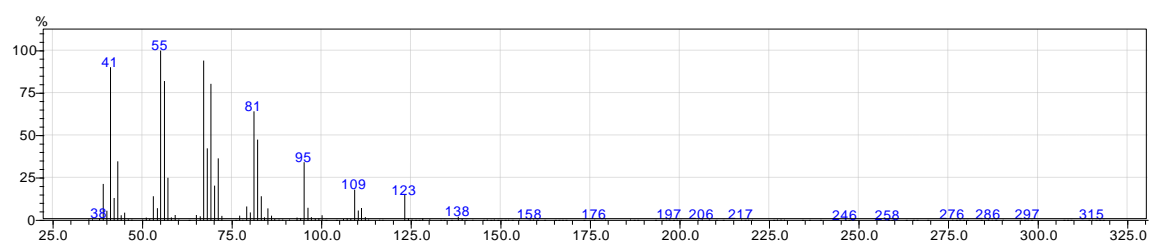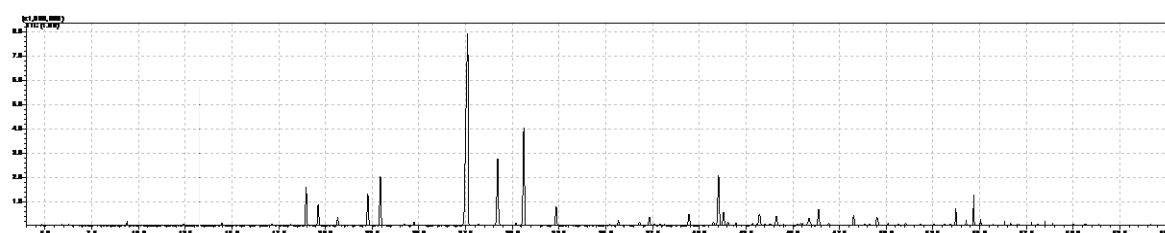

## C. Cedarwood EO

| No. | tR (min) | Peak Name              | Kl exp. | Kl lit. FFJ | Area (%) |
|-----|----------|------------------------|---------|-------------|----------|
| 1   | 28.40    | Thymol methyl ether    | 1245    | 1239        | 0.23     |
| 2   | 33.25    | <i>cis</i> -Patchenol  | 1314    | 1317        | 0.09     |
| 3   | 35.15    | Citronellyl acetate    | 1345    | 1359        | 0.16     |
| 4   | 36.98    | $\alpha$ -Copaene      | 1376    | 1375        | 0.60     |
| 5   | 37.39    | $\alpha$ -Duprezianene | 1383    | 1385        | 0.29     |
| 6   | 37.97    | $\beta$ -Elemene       | 1389    | 1390        | 1.35     |
| 7   | 38.44    | $\alpha$ -Chamipinene  | 1396    | 1399        | 0.29     |
| 8   | 39.00    | $\alpha$ -Cedrene      | 1408    | 1414        | 19.92    |
| 9   | 39.46    | $\beta$ -Cedrene       | 1415    | 1421        | 6.49     |
| 10  | 40.20    | <i>cis</i> -Thujopsene | 1420    | 1429        | 29.15    |
| 11  | 42.93    | $\beta$ -Chamigrene    | 1473    | 1476        | 1.78     |
| 12  | 50.17    | Cedrol                 | 1590    | 1598        | 21.16    |
| 13  | 54.18    | $\alpha$ -Bisabolol    | 1686    | 1688        | 1.22     |

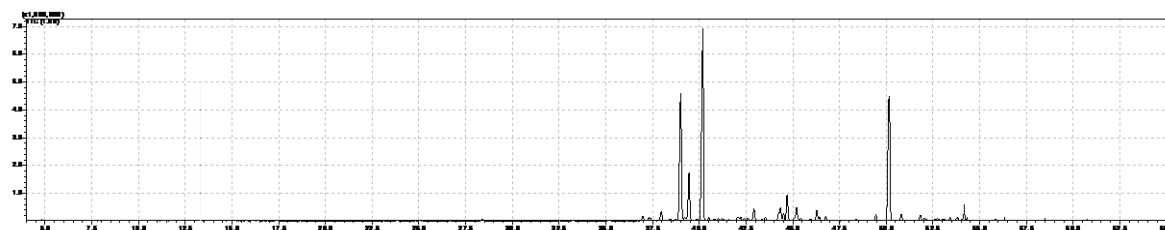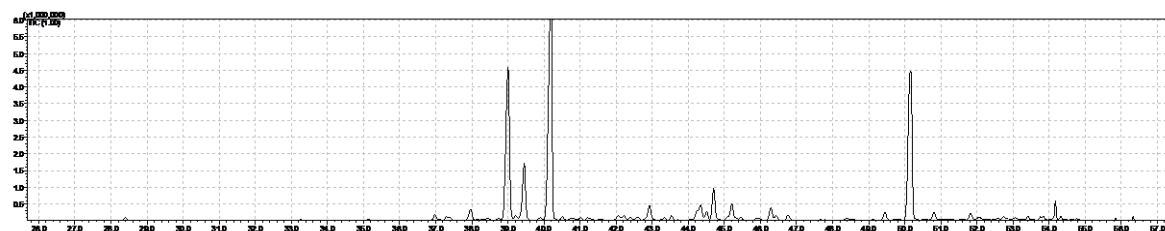

## D. TeaTree EO

| No. | tR (min) | Peak Name                          | KI exp. | KI lit. FFJ | Area (%) |
|-----|----------|------------------------------------|---------|-------------|----------|
| 1   | 9.05     | $\alpha$ -Thujene                  | 928     | 927         | 0.92     |
| 2   | 9.33     | $\alpha$ -Pinene                   | 928     | 933         | 2.37     |
| 3   | 11.31    | Sabinene                           | 976     | 972         | 0.38     |
| 4   | 11.42    | $\beta$ -Pinene                    | 976     | 978         | 0.68     |
| 5   | 12.34    | Myrcene                            | 991     | 991         | 0.71     |
| 6   | 12.97    | p-Mentha-1(7),8-diene              | 1001    | 1004        | 0.53     |
| 7   | 13.69    | $\alpha$ -Terpinene                | 1017    | 1018        | 9.76     |
| 8   | 14.13    | p-Cymene                           | 1024    | 1025        | 2.93     |
| 9   | 14.37    | $\beta$ -Phellandrene              | 1028    | 2031        | 1.71     |
| 10  | 14.47    | Eucalyptol                         | 1030    | 1032        | 1.96     |
| 11  | 16.26    | $\gamma$ -Terpinene                | 1052    | 1058        | 18.51    |
| 12  | 18.05    | Terpinolene                        | 1087    | 1086        | 3.45     |
| 13  | 18.64    | <i>trans</i> -Sabinene hydrate     | 1096    | 1099        | 0.04     |
| 14  | 18.90    | Linalool                           | 1099    | 1101        | 0.06     |
| 15  | 20.11    | <i>cis</i> -para-Menth-2-en-1-ol   | 1119    | 1124        | 0.28     |
| 16  | 21.3     | <i>trans</i> -para-Menth-2-en-1-ol | 1138    | 1039        | 0.21     |
| 17  | 23.89    | Terpinen-4-ol                      | 1177    | 1074        | 40.84    |
| 18  | 24.33    | p-Cymen-8-ol                       | 1183    | 1189        | 0.06     |
| 19  | 24.68    | $\alpha$ -Terpineol                | 1187    | 1195        | 3.45     |
| 20  | 24.98    | <i>cis</i> -Piperitol              | 1192    | 1198        | 0.08     |
| 21  | 25.82    | <i>trans</i> -Piperitol            | 1204    | 1209        | 0.12     |
| 22  | 29.80    | <i>trans</i> -Ascaridol glycol     | 1263    | 1270        | 0.11     |
| 23  | 30.96    | Phellandral                        | 1282    | 1277        | 0.06     |
| 24  | 33.16    | Undec-9-enal                       | 1314    | 1315        | 0.09     |
| 25  | 34.30    | $\delta$ -Elemene                  | 1333    | 1335        | 0.06     |
| 26  | 35.12    | $\alpha$ -Cubebene                 | 1345    | 1349        | 0.07     |
| 27  | 36.55    | Isodene                            | 1369    | 1372        | 0.08     |
| 28  | 36.72    | $\alpha$ -Copaene                  | 1373    | 1375        | 0.14     |
| 29  | 36.91    | $\alpha$ -Ylangene                 | 1373    | 1371        | 0.07     |
| 30  | 38.81    | $\alpha$ -Gurjunene                | 1403    | 1406        | 0.46     |
| 31  | 39.36    | $\beta$ -Isocomene                 | 1412    | 1413        | 0.41     |
| 32  | 39.90    | <i>trans</i> -Caryophyllene        | 1420    | 1424        | 0.08     |
| 33  | 40.26    | $\gamma$ -Elemene                  | 1427    | 1432        | 0.10     |
| 34  | 40.56    | Aromadendrene                      | 1435    | 1438        | 1.25     |
| 35  | 40.85    | $\alpha$ -Guaiane                  | 1438    | 1439        | 0.17     |

|    |       |                       |      |      |      |
|----|-------|-----------------------|------|------|------|
| 36 | 41.30 | Guaia-6,9-diene       | 1440 | 1444 | 0.14 |
| 37 | 41.45 | $\alpha$ -Himachalene | 1446 | 1449 | 0.13 |
| 38 | 41.88 | Alloaromadendrene     | 1455 | 1458 | 0.67 |
| 39 | 42.77 | Cadina-1(6),4-diene   | 1469 | 1472 | 0.46 |
| 40 | 43.42 | $\gamma$ -Gurjunene   | 1480 | 1476 | 0.11 |
| 41 | 43.57 | $\beta$ -Chamigrene   | 1481 | 1479 | 0.13 |
| 42 | 43.84 | $\delta$ -Selinene    | 1486 | 1489 | 0.21 |
| 43 | 44.05 | Viridiflorene         | 1490 | 1491 | 2.03 |
| 44 | 44.42 | $\alpha$ -Muurolene   | 1495 | 1497 | 0.20 |
| 45 | 45.79 | $\delta$ -Cadinene    | 1514 | 1518 | 1.95 |
| 46 | 46.25 | Zonarene              | 1525 | 1526 | 0.26 |
| 47 | 47.74 | Unknown               | 1552 | n.d. | 0.09 |
| 48 | 48.15 | Germacrene B          | 1560 | 1557 | 0.14 |
| 49 | 48.76 | Spathulenol           | 1574 | 1576 | 0.11 |
| 50 | 49.13 | Ledol                 | 1576 | 1579 | 0.37 |
| 51 | 49.55 | Globulol              | 1584 | 1592 | 0.18 |
| 52 | 50.19 | Viridiflorol          | 1590 | 1594 | 0.13 |
| 53 | 51.35 | $\gamma$ -Eudesmol    | 1619 | 1624 | 0.14 |
| 54 | 51.69 | Epicubenol            | 1629 | 1631 | 0.22 |

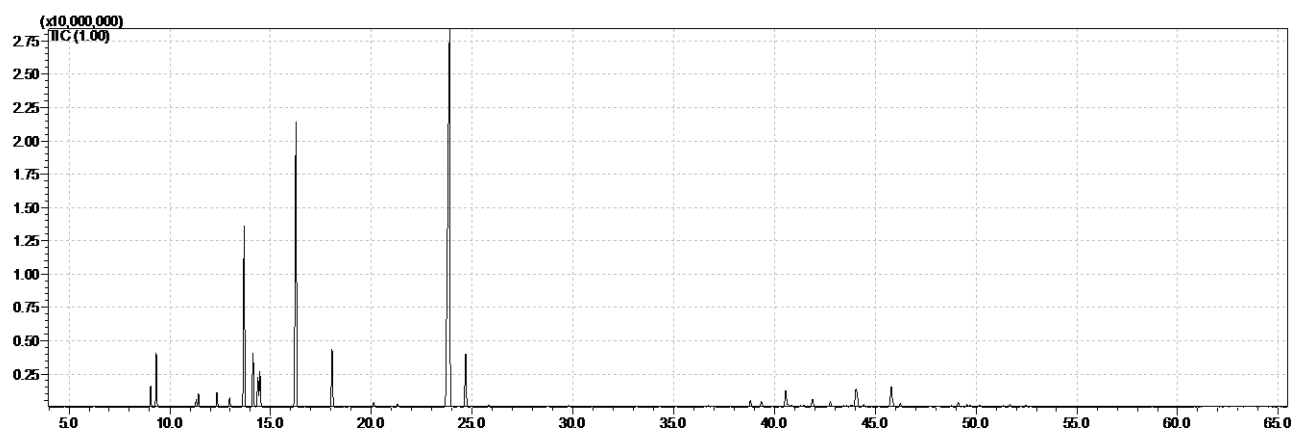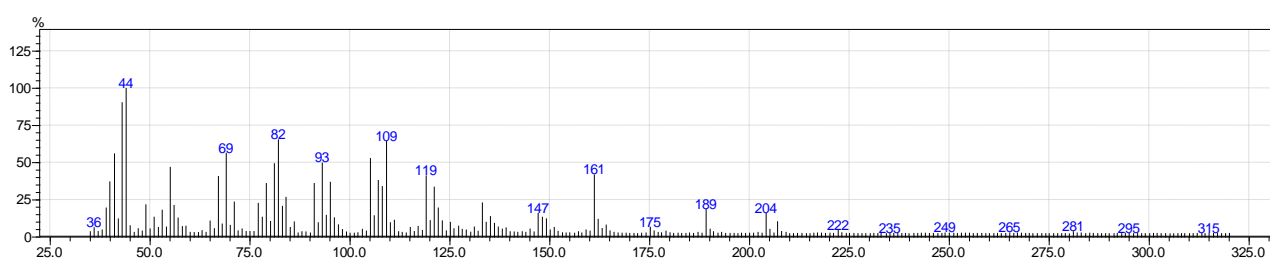

**E. Frankincense EO**

| No. | tR (min) | Peak Name                            | KI exp. | KI lit. FFJ | Area (%) |
|-----|----------|--------------------------------------|---------|-------------|----------|
| 1   | 8.7      | Artemisia triene                     | 926     | 922         | 0.21     |
| 2   | 9.11     | $\alpha$ -Thujene                    | 928     | 927         | 3.51     |
| 3   | 9.445    | $\alpha$ -Pinene                     | 932     | 933         | 40.14    |
| 4   | 10.065   | Camphene                             | 953     | 953         | 1.16     |
| 5   | 10.36    | Thuja-2,4(10)-diene                  | 955     | 953         | 0.29     |
| 6   | 11.37    | Sabinene                             | 976     | 972         | 4.34     |
| 7   | 11.49    | $\beta$ -Pinene                      | 977     | 978         | 2.03     |
| 8   | 12.405   | $\beta$ -Myrcene                     | 992     | 991         | 4.53     |
| 9   | 13.035   | $\alpha$ -Phellandrene               | 1004    | 1007        | 2.77     |
| 10  | 13.36    | $\delta$ -3-Carene                   | 1011    | 1009        | 1.05     |
| 11  | 13.745   | $\alpha$ -Terpinene                  | 1017    | 1118        | 0.12     |
| 12  | 14.205   | p-Cymene                             | 1025    | 1025        | 4.48     |
| 13  | 14.475   | Limonene                             | 1030    | 1030        | 15.66    |
| 14  | 15.14    | <i>cis</i> - $\beta$ -Ocimene        | 1041    | 1035        | 0.15     |
| 15  | 15.76    | <i>trans</i> - $\beta$ -Ocimene      | 1052    | 1046        | 0.11     |
| 16  | 16.3     | $\gamma$ -Terpinene                  | 1056    | 1058        | 0.25     |
| 17  | 18.13    | Terpinolene                          | 1088    | 1086        | 0.20     |
| 18  | 20.505   | $\alpha$ -Campholenal                | 1123    | 1125        | 0.15     |
| 19  | 21.23    | <i>trans</i> -Pinocarveol            | 1141    | 1141        | 0.44     |
| 20  | 21.705   | <i>trans</i> -Verbenol               | 1144    | 1145        | 0.70     |
| 21  | 23.82    | <i>trans</i> - $\beta$ -Terpineol    | 1177    | 1170        | 0.71     |
| 22  | 24.395   | p-Cymen-8-ol                         | 1183    | 1189        | 0.26     |
| 23  | 24.74    | $\alpha$ -Terpineol                  | 1189    | 1195        | 0.36     |
| 24  | 25.875   | Verbenone                            | 1205    | 1204        | 0.26     |
| 25  | 26.645   | <i>trans</i> -Carveol                | 1217    | 1216        | 0.18     |
| 26  | 31.075   | Bornyl acetate                       | 1286    | 1285        | 0.61     |
| 27  | 32.99    | n-Undecanal                          | 1314    | 1309        | 0.14     |
| 28  | 35.225   | $\alpha$ -Cubebene                   | 1347    | 1349        | 0.44     |
| 29  | 36.815   | $\alpha$ -Copaene                    | 1373    | 1375        | 0.99     |
| 30  | 37.755   | $\beta$ -Bourbonene                  | 1387    | 1388        | 0.09     |
| 31  | 37.905   | $\beta$ -Elemene                     | 1389    | 1390        | 1.65     |
| 32  | 39.46    | <i>trans</i> -Caryophyllene          | 1415    | 1425        | 4.28     |
| 33  | 40.65    | <i>trans</i> - $\alpha$ -Bergamotene | 1433    | 1432        | 0.25     |
| 34  | 41.54    | $\alpha$ -Humulene                   | 1453    | 1454        | 0.85     |
| 35  | 41.985   | Alloaromadendrene                    | 1458    | 1458        | 0.24     |
| 36  | 43.06    | $\gamma$ -Muurolene                  | 1474    | 1478        | 0.43     |
| 37  | 43.25    | Germacrene D                         | 1477    | 1480        | 0.22     |



|    |        |                       |      |      |      |
|----|--------|-----------------------|------|------|------|
| 38 | 43.525 | $\gamma$ -Himachalene | 1481 | 1482 | 0.71 |
| 39 | 44.095 | $\beta$ -Selinene     | 1490 | 1492 | 0.81 |
| 40 | 45.27  | $\gamma$ -Cadinene    | 1509 | 1512 | 1.08 |
| 41 | 45.885 | $\delta$ -Cadinene    | 1521 | 1518 | 1.05 |
| 42 | 49.125 | Longipinanol          | 1576 | 1572 | 1.01 |
| 43 | 49.65  | Caryophyllene oxide   | 1585 | 1587 | 0.36 |
| 44 | 52.5   | T-Muurolol            | 1646 | 1641 | 0.59 |

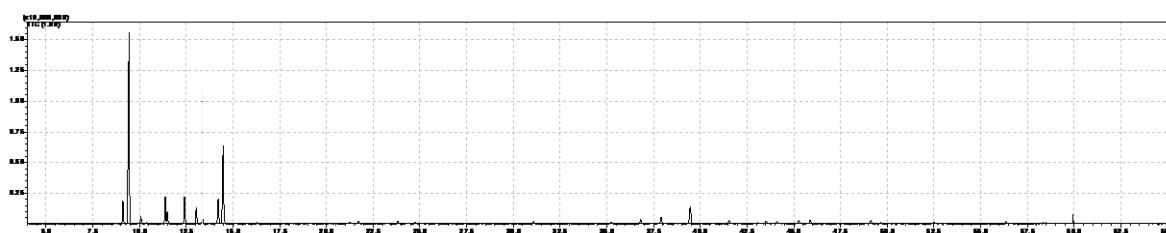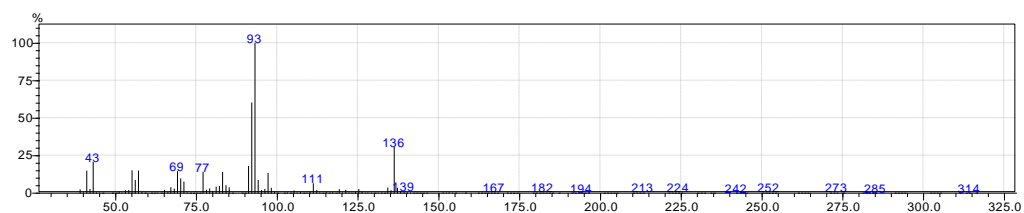

Supplement: s1 [file s1]
